# Supplementary material for: Cost-effective synthesis of hierarchical SAPO-34 zeolites with abundant intracrystalline mesopores and excellent MTO performance
Source: Royal Society of Chemistry journal article supplement (doi:10.1039/c8cc00326b), 2018-01-01
Supplement: c8cc00326b1.pdf [file c8cc00326b1.pdf]

## **Electronic Supplementary Information (ESI)**

### **Cost-Effective Synthesis of Hierarchical SAPO-34 Zeolites with Abundant Intracrystalline Mesopores and Excellent MTO Performance**

Guanqi Guo,<sup>a</sup> Qiming Sun,<sup>\*a</sup> Ning Wang,<sup>a</sup> Risheng Bai<sup>a</sup> and Jihong Yu<sup>a</sup>

<sup>a</sup> State Key Laboratory of Inorganic Synthesis and Preparative Chemistry, College of Chemistry, Jilin University, Changchun 130012, People's Republic of China

E-mail: sunqm13@mails.jlu.edu.cn

## **Contents**

A. Materials and methods

B. Characterizations

C. Catalytic tests and carbon deposit analyses.

D. Supplementary figures and tables

## A. Materials and methods

The reagents used in this work include aluminum iso-propoxide ( $\text{Al}(\text{OPr}^i)_3$  (99.5 wt%, Beijing Reagents Company), phosphoric acid ( $\text{H}_3\text{PO}_4$ , 85 wt%, Beijing Chemical Works), morpholine (MOR,  $\text{C}_4\text{H}_9\text{NO}$ , >98.5%, Tianjin Guangfu fine chemical research institute), tetraethylorthosilicate (TEOS) (Beijing Chemical Works), PDADMAC (poly-diallyldimethylammonium chloride,  $(\text{C}_8\text{H}_{16}\text{NCl})_n$  Aladdin, MW  $\leq 10\text{w}$ , 20 wt% in water)

**Synthesis of hierarchical SAPO-34 catalysts ( $S_{\text{H1}}$ ,  $S_{\text{H2}}$  and  $S_{\text{H3}}$ ):** The hierarchical SAPO-34 catalysts ( $S_{\text{H1}}$ ,  $S_{\text{H2}}$  and  $S_{\text{H3}}$ ) were synthesized under hydrothermal conditions from the starting gel with the optimized molar composition of  $1.0\text{Al}_2\text{O}_3$ :  $1.0\text{P}_2\text{O}_5$ :  $3.0\text{MOR}$ :  $0.6\text{SiO}_2$ :  $80\text{H}_2\text{O}$ :  $x\text{PDADMAC}$  ( $x = 1.0 \times 10^{-4}$ ,  $1.5 \times 10^{-4}$  and  $2.0 \times 10^{-4}$ ) at  $180\text{ }^\circ\text{C}$  by using the morpholine (MOR) as the microporous template and the PDADMAC as mesoporous template. Typically, a certain amount of PDADMAC was firstly mixed with MOR solution and deionized water at room temperature. Then the finely ground  $\text{Al}(\text{OPr}^i)_3$  (100 mesh) was added into the mixture under vigorous stirring for 2 h. Subsequently, the phosphoric acid solution was added dropwise to the resultant solution, followed by a continuous stirring for 2 h. Finally, TEOS was added slowly. The reaction mixture was further stirred for 1 h and then was transferred into a 100mL Teflon-lined stainless steel autoclave. The crystallization was conducted in a conventional oven at  $180\text{ }^\circ\text{C}$  for 3 days under the static condition. The as-synthesized solid products were centrifuged, washed with water and ethanol for several times, and then dried at  $80\text{ }^\circ\text{C}$  in the oven overnight, followed by calcination at  $550\text{ }^\circ\text{C}$  for 8 h.

**Conventional microporous SAPO-34 catalysts ( $S_{\text{M}}$  and  $S_{\text{M1}}$ ):** The conventional microporous SAPO-34 catalyst ( $S_{\text{M}}$ ) was synthesized from the starting gel with the molar composition of  $1.0\text{Al}_2\text{O}_3$ :  $1.0\text{P}_2\text{O}_5$ :  $3.0\text{MOR}$ :  $0.6\text{SiO}_2$ :  $80\text{H}_2\text{O}$  under hydrothermal condition at  $180\text{ }^\circ\text{C}$  for 3 days. The microporous SAPO-34 catalyst ( $S_{\text{M1}}$ ) was synthesized from the starting gel with lower silicon content and the molar composition is  $1.0\text{Al}_2\text{O}_3$ :  $1.0\text{P}_2\text{O}_5$ :  $3.0\text{MOR}$ :  $0.4\text{SiO}_2$ :  $80\text{H}_2\text{O}$ . The synthetic process was similar with that of hierarchical SAPO-34 catalysts except for without adding the surfactants.

## B. Characterizations

The crystallinity and phase purity of the samples were characterized by power X-ray diffraction (XRD) on a Rigaku D-Max 2550 diffractometer using Cu K $\alpha$  radiation ( $\lambda = 1.5418\text{ \AA}$ ). The crystal size and morphology were recorded with a scanning electron microscopy (SEM) using a JSM-6510F (JEOL) electron microscope. Transmission electron microscopy (TEM) images were

measured by a Tecnai F20 electron microscope. The selected area electron diffraction patterns were measured on a JEM-2100F electron microscope. Chemical compositions were analyzed by an X-ray fluorescence (XRF) spectrometer (PANalytical, AXIOS). CHN elemental analyses were analyzed by a CHN elemental analyzer (vario MICRO). Thermogravimetric (TG) analysis was performed on a TA company TGA Q500 unit in air at a heating rate of 10 K min<sup>-1</sup> from room temperature to 800 °C in air. Nitrogen adsorption/desorption measurements were carried out on a Micromeritics 2020 analyzer at 77.35 K after the samples were degassed at 350 °C under vacuum. The temperature-programmed desorption of ammonia (NH<sub>3</sub>-TPD) experiments were performed using a Micromeritics AutoChem II 2920 automated chemisorption analysis unit with a thermal conductivity detector (TCD) under helium flow. The NMR experiments were performed on a Varian Infinity plus 400WB spectrometer with BBO MAS probe operating at a magnetic field strength of 9.4 T. The resonance frequency in this field strength was 79.5 MHz for <sup>29</sup>Si. Chemical shifts were referenced to 2, 2-dimethyl-2-ethylpentane-5-sulfonate sodium salt (DSS) for <sup>29</sup>Si. Liquid <sup>13</sup>C NMR measurements were carried out on a nuclear magnetic resonance spectrometer (Avance III).

### C. Catalytic tests

The MTO reaction was carried out using a quartz reactor fixed-bed reactor at atmospheric pressure. 0.3 g calcined SAPO-34 crystals was loaded into quartz reactor (6 mm inner diameter) after being ground into powder (40~60 mesh). The catalyst was activated at 773 K in a nitrogen flow of 30 mL/min for 1 h before starting each reaction run, and then the temperature was adjusted to reaction temperature of 673 K. Methanol was fed by passing the carrier gas (15 mL/min) through a saturator containing methanol at 40 °C, which gave a weight hourly space velocity (WHSV) of 2.0 h<sup>-1</sup>. In addition, the methanol was fed by passing the carrier gas (20 mL/min) through a saturator containing methanol at 60 °C, which gave a WHSV of 23.0 h<sup>-1</sup>. The reaction products were analyzed using an online gas chromatograph (Agilent GC 7890N), equipped with a flame ionization detector (FID) and Plot-Q column (Agilent J&W GC Columns, HP-PLOT/Q 19091-Q04, 30 m×320 μm×10 μm). The conversion and selectivity were calculated on CH<sub>2</sub> basis and dimethyl ether (DME) was considered as reactant in the calculation.

The amount of generated coke in SAPO-34 catalysts after the MTO reactions was determined by thermal analysis (TG) on a Perkin-Elmer TGA7 at a heating rate of 10 K min<sup>-1</sup> from room temperature to 800 °C under air flow. To analyze the coke species in the deactivated SAPO-34 catalysts, the deactivated catalysts were etched by HF solution until the zeolites dissolved completely, and then extracted by CH<sub>2</sub>Cl<sub>2</sub>. Subsequently, the obtained solutions were analyzed by GC-MS. (Thermo Fisher Trace ISQ, equipped with TG-5MS column, 60 m × 320 μm × 25 μm).

#### D. Supplementary figures and tables

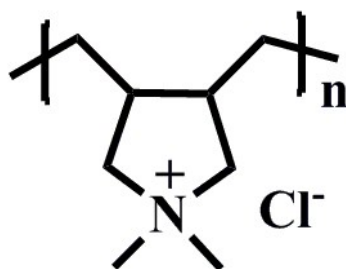

**Scheme S1.** Chemical structure formula of poly-diallyldimethylammonium chloride (PDADMAC).

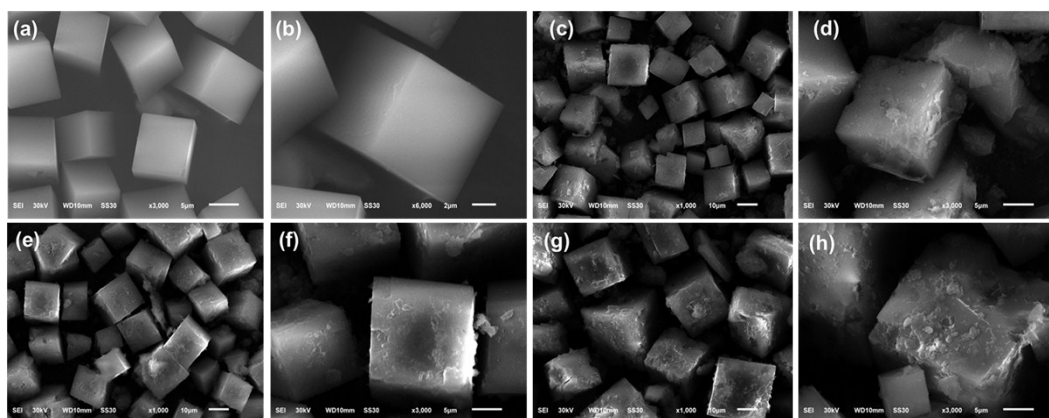

**Figure S1.** SEM images of conventional microporous SAPO-34 sample (a, b) and hierarchical SAPO-34 samples  $S_{H1}$  (c, d),  $S_{H2}$  (e, f) and  $S_{H3}$  (g, h).

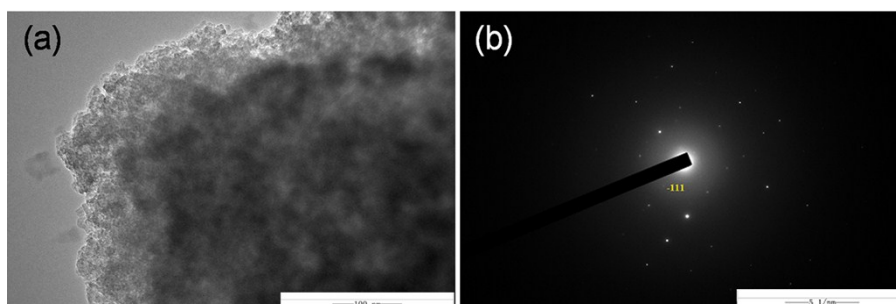

**Figure S2.** TEM image of hierarchical SAPO-34 sample  $S_{H3}$  (a) and corresponding selected area electron diffraction pattern (b).

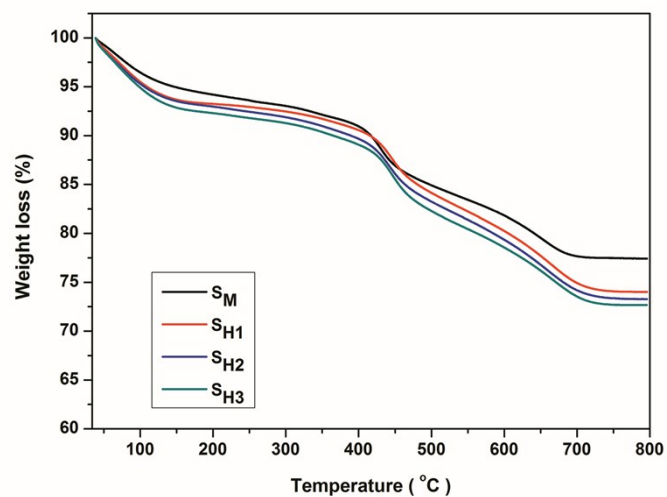

**Figure S3.** TG curves of conventional microporous SAPO-34 ( $S_M$ ) and hierarchical SAPO-34 ( $S_{H1}$ ,  $S_{H2}$  and  $S_{H3}$ ) catalysts.

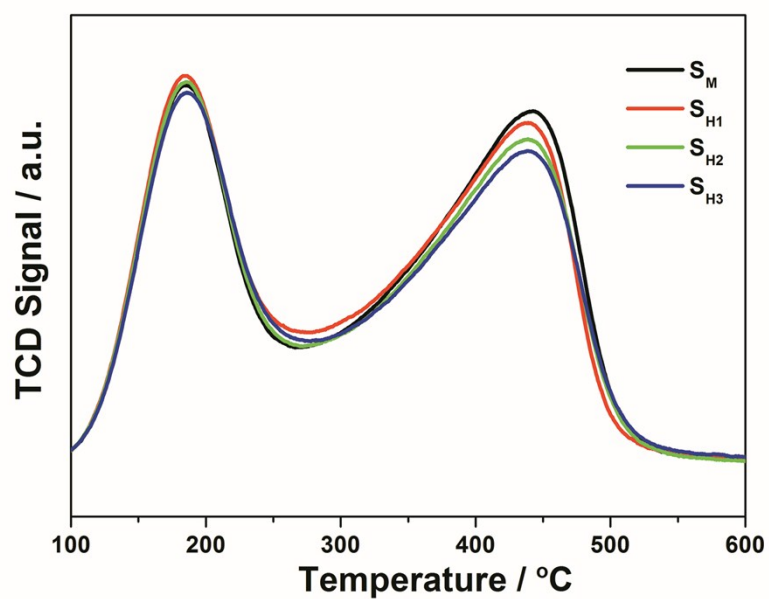

**Figure S4.**  $NH_3$ -TPD profiles of conventional microporous SAPO-34 ( $S_M$ ) and hierarchical SAPO-34 ( $S_{H1}$ ,  $S_{H2}$  and  $S_{H3}$ ) catalysts.

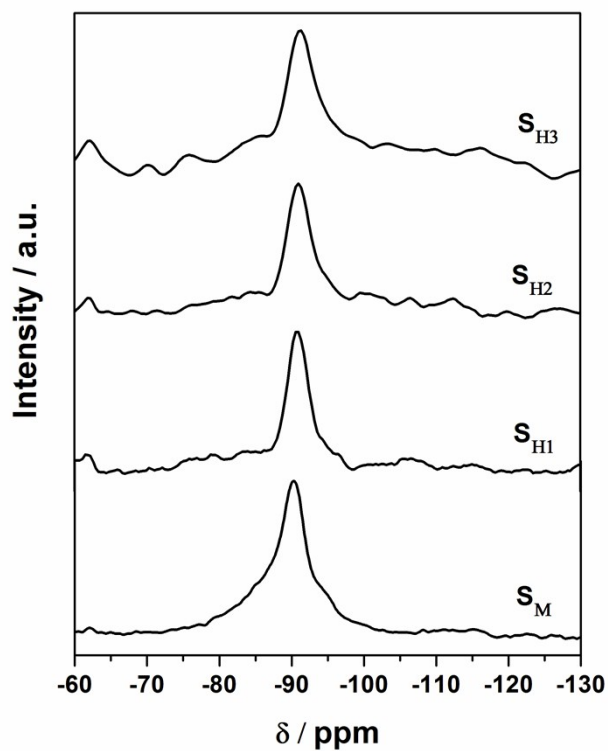

**Figure S5.**  $^{29}\text{Si}$  MAS NMR spectra of conventional microporous SAPO-34 ( $S_M$ ) and hierarchical SAPO-34 ( $S_{H1}$ ,  $S_{H2}$  and  $S_{H3}$ ) catalysts.

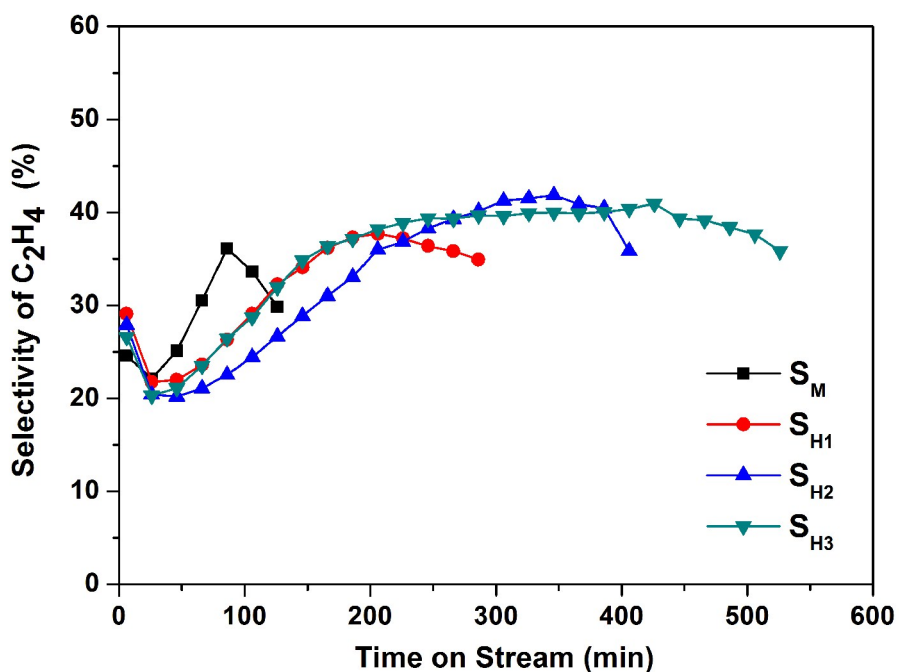

**Figure S6.** Selectivity of ethylene over conventional microporous SAPO-34 ( $S_M$ ) and hierarchical SAPO-34 ( $S_{H1}$ ,  $S_{H2}$  and  $S_{H3}$ ) catalysts. Experimental conditions: WHSV=2 h<sup>-1</sup>, T=673 K, catalyst weight =300 mg.

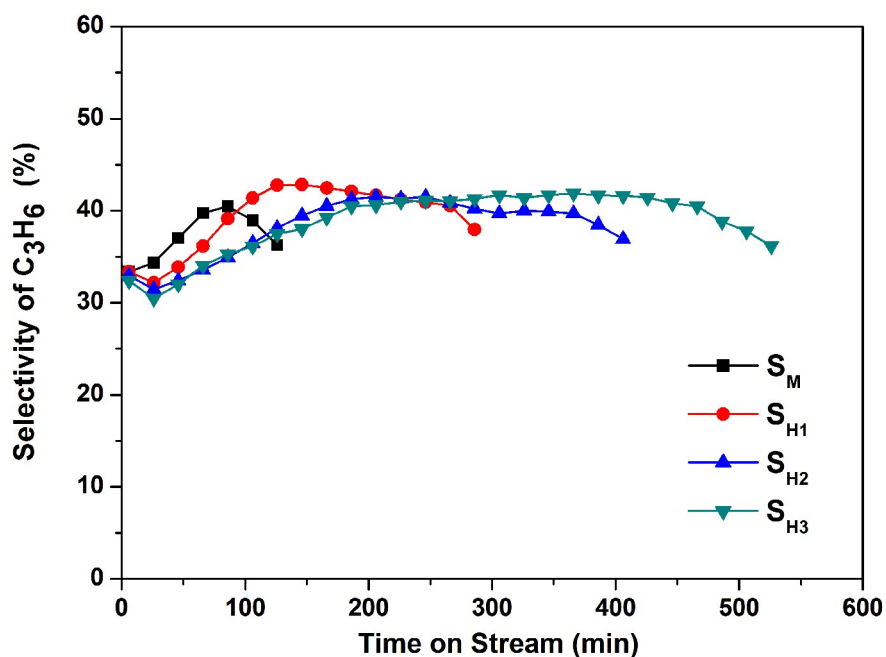

**Figure S7.** Selectivity of propylene over conventional microporous SAPO-34 ( $S_M$ ) and hierarchical SAPO-34 ( $S_{H1}$ ,  $S_{H2}$  and  $S_{H3}$ ) catalysts. Experimental conditions: WHSV=2 h<sup>-1</sup>, T=673 K, catalyst weight =300 mg.

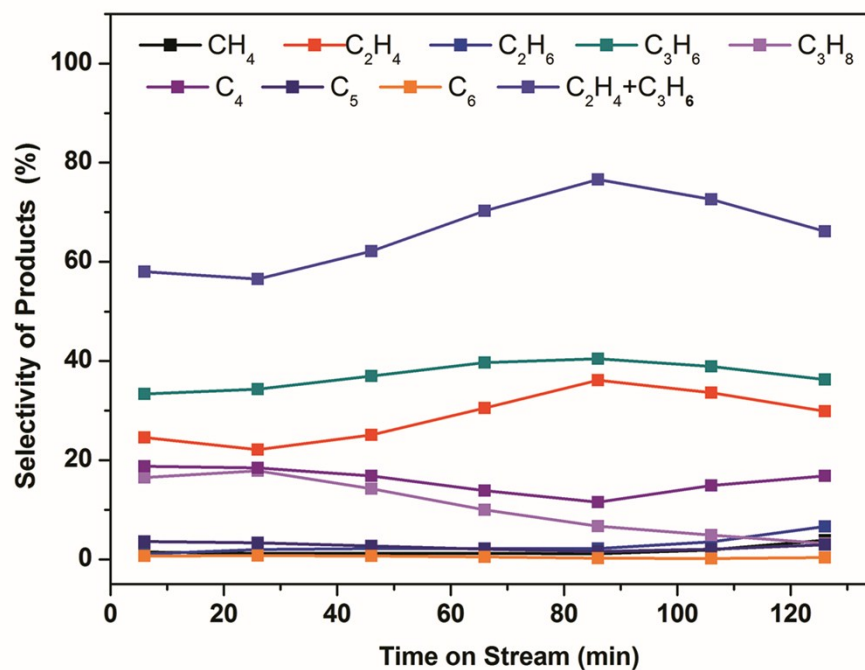

**Figure S8.** Products distribution of conventional microporous SAPO-34 catalysts ( $S_M$ ) in MTO reaction. Experimental conditions: WHSV = 2 h<sup>-1</sup>, T = 673 K, catalyst weight = 300 mg.



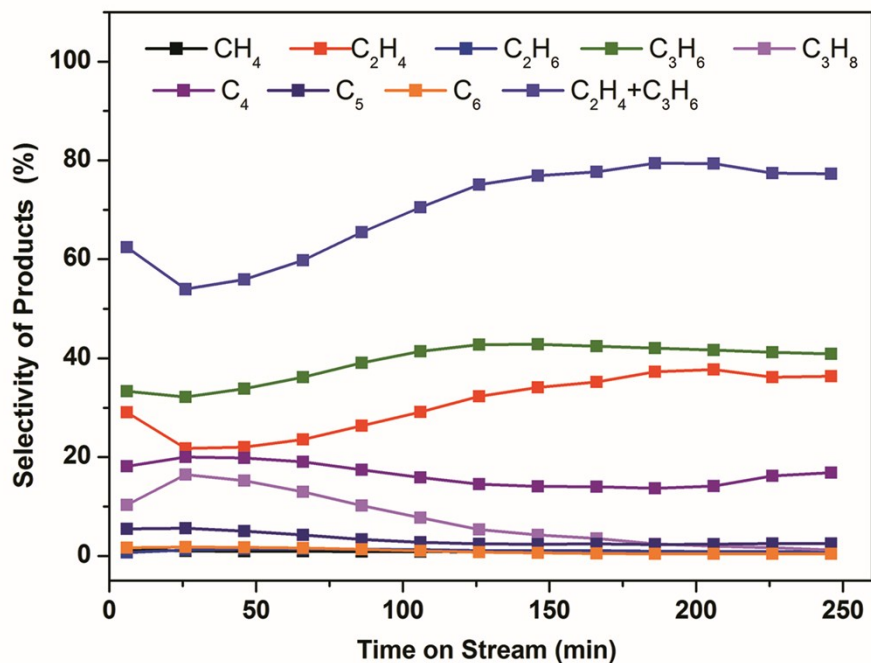

**Figure S9.** Products distribution of hierarchical SAPO-34 catalysts (S<sub>H1</sub>) in MTO reaction. Experimental conditions: WHSV = 2 h<sup>-1</sup>, T = 673 K, catalyst weight = 300 mg.

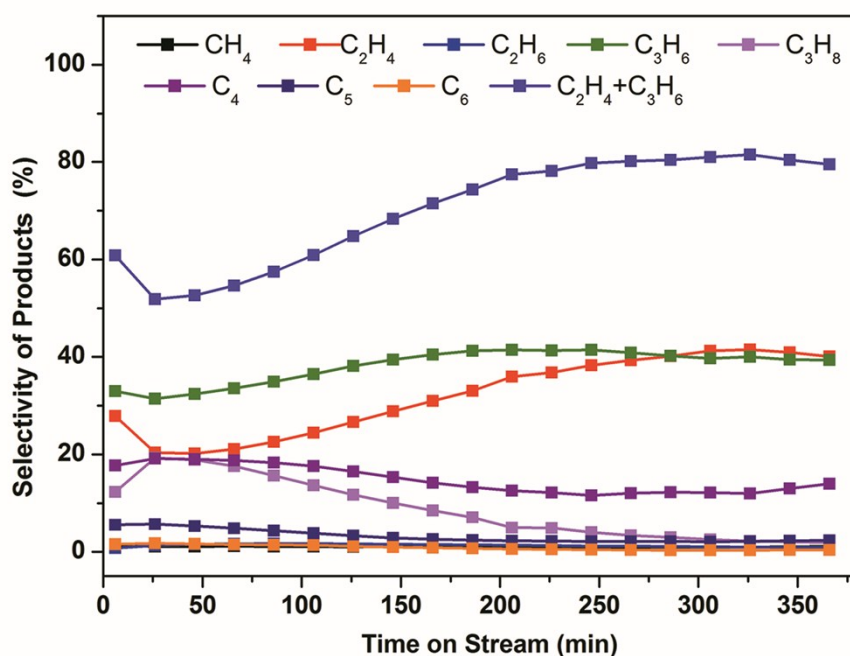

**Figure S10.** Products distribution of hierarchical SAPO-34 catalysts (S<sub>H2</sub>) in MTO reaction. Experimental conditions: WHSV = 2 h<sup>-1</sup>, T = 673 K, catalyst weight = 300 mg.

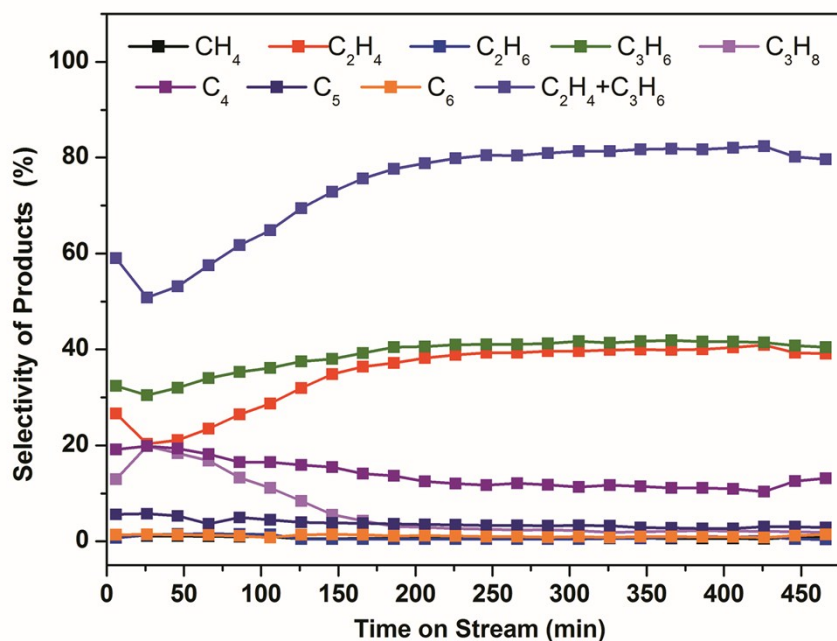

**Figure S11.** Products distribution of hierarchical SAPO-34 catalysts ( $S_{H3}$ ) in MTO reaction. Experimental conditions: WHSV = 2 h<sup>-1</sup>, T = 673 K, catalyst weight = 300 mg.

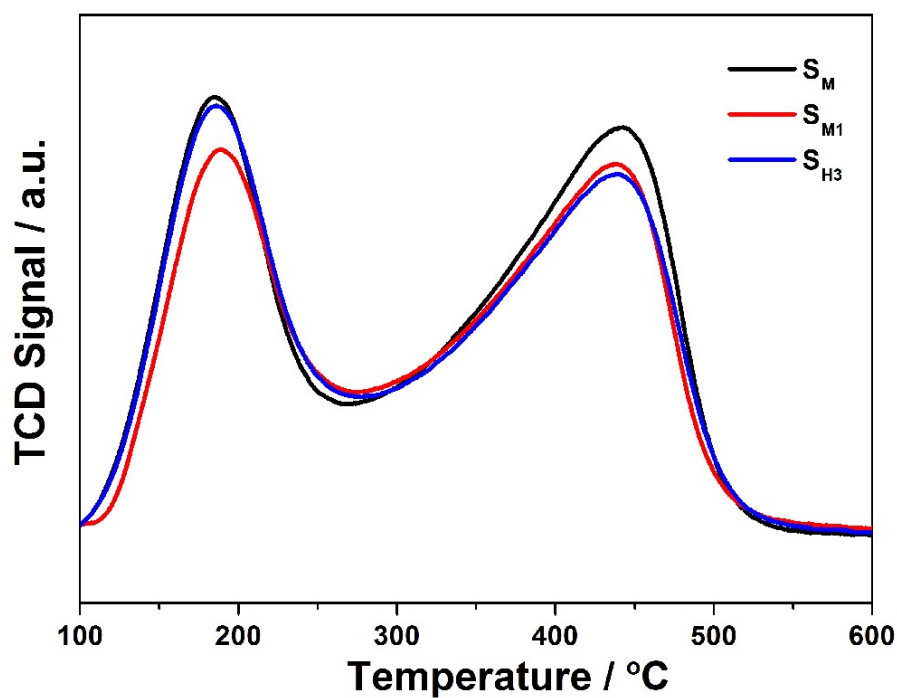

**Figure S12.** NH<sub>3</sub>-TPD profiles of conventional microporous  $S_M$  and  $S_{M1}$  as well as hierarchical  $S_{H3}$  catalysts.

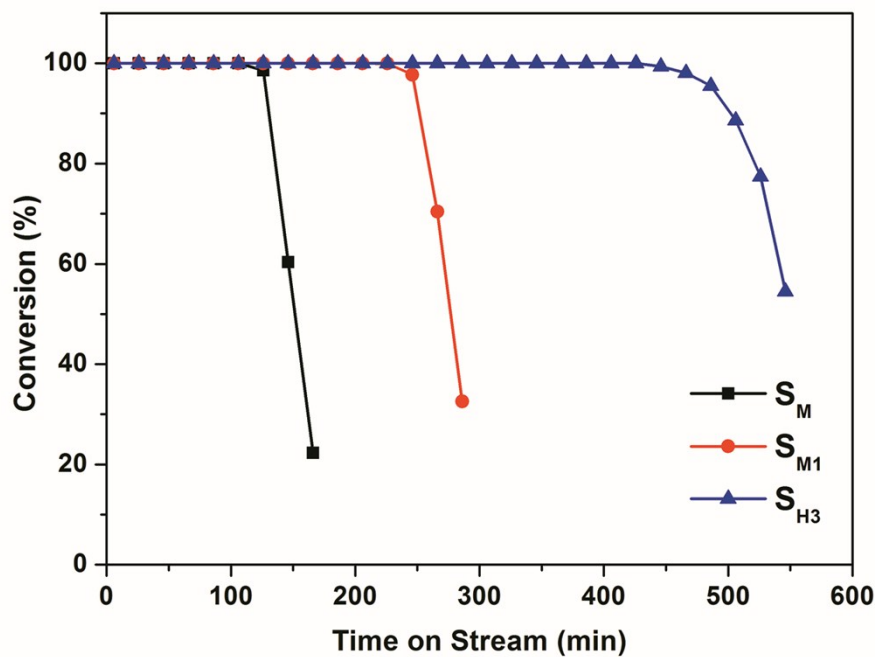

**Figure S13.** Lifetime of conventional microporous  $S_M$  and  $S_{M1}$  as well as hierarchical  $S_{H3}$  catalysts. Experimental conditions: WHSV =  $2 \text{ h}^{-1}$ ,  $T = 673 \text{ K}$ , catalyst weight = 300 mg.

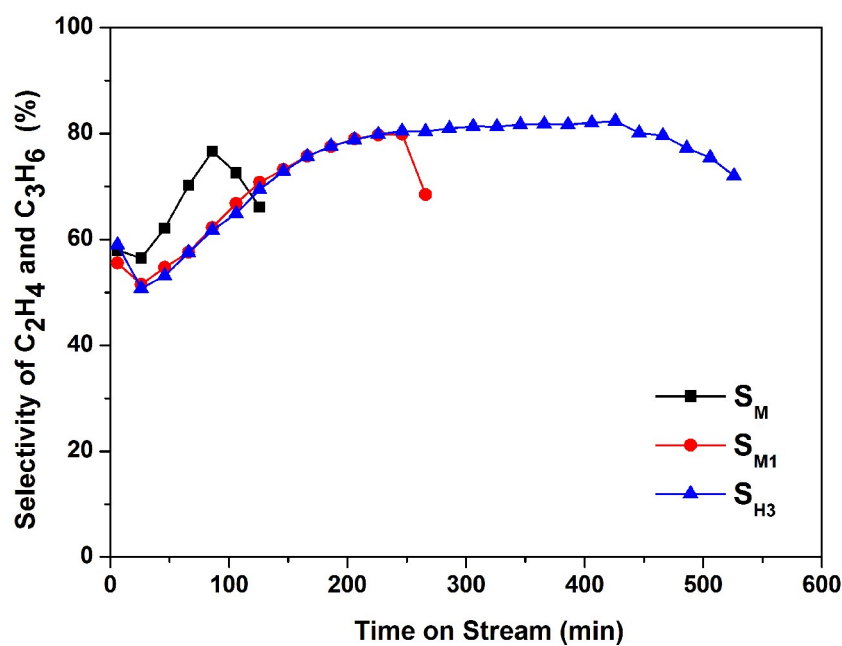

**Figure S14.** Selectivity of ethylene and propylene of conventional microporous  $S_M$  and  $S_{M1}$  as well as hierarchical  $S_{H3}$  catalysts. Experimental conditions: WHSV =  $2 \text{ h}^{-1}$ ,  $T = 673 \text{ K}$ , catalyst weight = 300 mg.

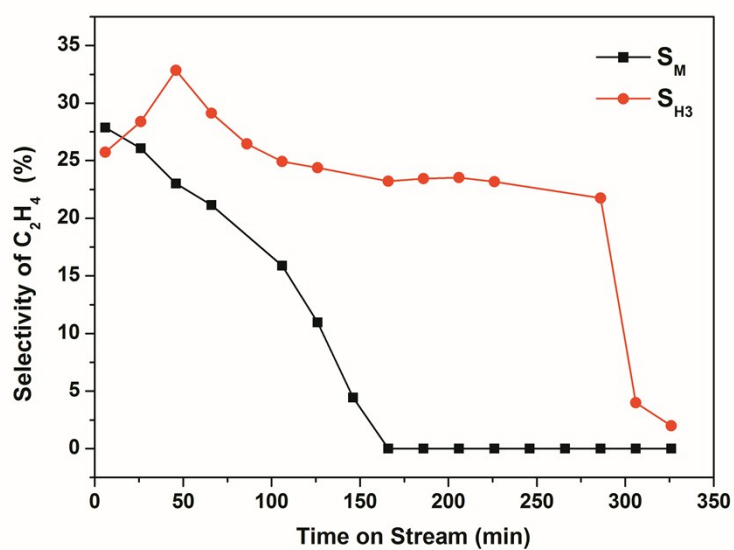

**Figure S15.** Selectivity of ethylene over conventional microporous SAPO-34 ( $S_M$ ) and hierarchical SAPO-34 ( $S_{H3}$ ). Experimental conditions: WHSV=23 h<sup>-1</sup>, T=673 K, catalyst weight =300 mg.

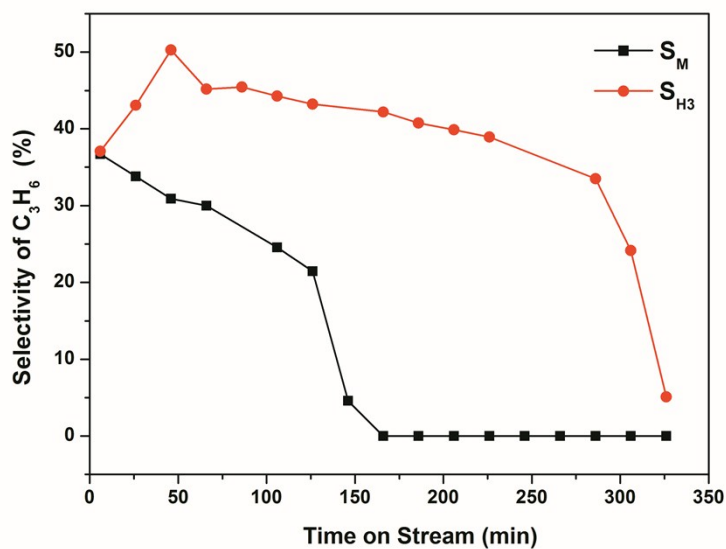

**Figure S16.** Selectivity of propylene over conventional microporous SAPO-34 ( $S_M$ ) and hierarchical SAPO-34 ( $S_{H3}$ ). Experimental conditions: WHSV=23 h<sup>-1</sup>, T=673 K, catalyst weight =300 mg.

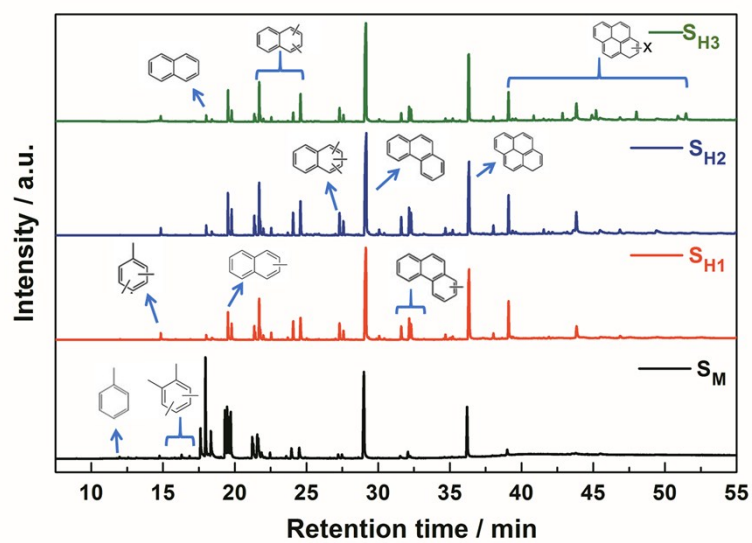

**Figure S17.** GC-MS of occluded organic species retained in the SAPO-34 catalysts after methanol conversion at 673K. The structures annotated onto the chromatograms are peak identifications in comparison with the mass spectra of those in the NIST database.

**Table S1.** MTO catalytic results of conventional microporous SAPO-34 ( $S_M$ ) and hierarchical SAPO-34 ( $S_{H1}$ ,  $S_{H2}$  and  $S_{H3}$ ) catalysts.

| Catalysts | TOS<br>(min) | Selectivity (%) |                               |                               |                               |                               |                |                             |                                                          |
|-----------|--------------|-----------------|-------------------------------|-------------------------------|-------------------------------|-------------------------------|----------------|-----------------------------|----------------------------------------------------------|
|           |              | CH <sub>4</sub> | C <sub>2</sub> H <sub>4</sub> | C <sub>2</sub> H <sub>6</sub> | C <sub>3</sub> H <sub>6</sub> | C <sub>3</sub> H <sub>8</sub> | C <sub>4</sub> | C <sub>5</sub> <sup>+</sup> | C <sub>2</sub> <sup>=</sup> +C <sub>3</sub> <sup>=</sup> |
| $S_M$     | 86*          | 1.2             | 30.5                          | 2.2                           | 39.7                          | 10.0                          | 13.9           | 2.5                         | 70.2                                                     |
| $S_{H1}$  | 206*         | 0.8             | 37.7                          | 0.9                           | 41.7                          | 2.2                           | 14.0           | 2.7                         | 79.4                                                     |
| $S_{H2}$  | 326*         | 0.6             | 40.5                          | 1.0                           | 40.9                          | 2.2                           | 12.0           | 2.8                         | 81.4                                                     |
| $S_{H3}$  | 426*         | 0.5             | 40.9                          | 0.9                           | 41.6                          | 2.1                           | 10.4           | 3.6                         | 82.5                                                     |

Experimental conditions: WHSV = 2 h<sup>-1</sup>, T = 673 K, catalyst weight = 300 mg.

\* Lifetime: the reaction duration with the 100% conversion of methanol.

**Table S2.** The rates of coke formation in methanol conversion over conventional microporous SAPO-34 ( $S_M$ ) and hierarchical SAPO-34 ( $S_{H1}$ ,  $S_{H2}$  and  $S_{H3}$ ) catalysts.

| Catalysts                                    | $S_M$ | $S_{H1}$ | $S_{H2}$ | $S_{H3}$ |
|----------------------------------------------|-------|----------|----------|----------|
| Coke (% <sub>g/g Cat.</sub> ) <sup>(a)</sup> | 14.01 | 17.43    | 20.88    | 21.42    |
| TOS(min) <sup>(b)</sup>                      | 86    | 206      | 326      | 426      |
| R <sub>coke</sub> (mg/min) <sup>(c)</sup>    | 0.489 | 0.254    | 0.192    | 0.151    |
| P <sub>coke</sub> (g/gMeOH) <sup>(d)</sup>   | 0.048 | 0.026    | 0.019    | 0.015    |

(a) Coke weight percent with > 99.9% methanol conversion;

(b) The reaction duration with > 99.9% methanol conversion;

(c) R<sub>coke</sub>(mg/min) = coke amount(mg)/reaction time (min);

(d) P<sub>coke</sub>(g/gMeOH) = coke amount (g)/methanol feedstock (g).
